1 **Oral health vulnerability and its associated risk factors among tribal elderly people in**  
2 **Bangladesh: a pilot study**

3 Shomrita Barua<sup>1</sup>, Sunanda Bosu<sup>2</sup>, Mohammad Farhadul Haque<sup>3</sup>, Liza Bosak<sup>4</sup>, Md Rezowan  
4 Rashid<sup>5</sup>, Shaikh Riaduz Zaman<sup>6</sup>, Md. Foyzur Rahman<sup>7</sup>, Mohammad Meshbahur Rahman<sup>8\*</sup>

5  
6 <sup>1</sup>Directorate General of Health Services (DGHS), Mohakhali, Dhaka-1212, Bangladesh. Email:  
7 [shomrita88@gmail.com](mailto:shomrita88@gmail.com); ORCID: 0000-0001-6948-1736

8 <sup>2</sup>Institute of Epidemiology Disease Control and Research (IEDCR), Dhaka-1212, Bangladesh.  
9 Email: [sumibasus@gmail.com](mailto:sumibasus@gmail.com); ORCID: 0000-0001-9892-4006

10 <sup>3</sup>Shaheed Monsur Ali Medical College Hospital, Uttara, Dhaka. Email:  
11 [farhadulhaque@gmail.com](mailto:farhadulhaque@gmail.com); ORCID: 0000-0003-2690-5900

12 <sup>4</sup>Basic Science Division, World University of Bangladesh. Email: [liza.bosak13@yahoo.com](mailto:liza.bosak13@yahoo.com);  
13 ORCID: 0000-0003-1034-0706

14 <sup>5</sup>Director General of Health Services of Bangladesh, Dhaka-1212, Bangladesh. Email:  
15 [dr.rezowanrashid@gmail.com](mailto:dr.rezowanrashid@gmail.com); ORCID: 0000-0002-3328-2353

16 <sup>6</sup>Director General of Health Services of Bangladesh, Dhaka-1212, Bangladesh. Email:  
17 [sriaduzzaman@gmail.com](mailto:sriaduzzaman@gmail.com); ORCID: 0000-0003-4465-8368

18 <sup>7</sup>Department of Community Medicine, National Institute of Preventive and Social Medicine,  
19 Dhaka-1212, Bangladesh. Email: [foyzr1@gmail.com](mailto:foyzr1@gmail.com); ORCID: 0000-0003-1124-8784

20 <sup>8</sup>Department of Biostatistics, National Institute of Preventive and Social Medicine, Dhaka-1212,  
21 Bangladesh. Email: [meshbah037@gmail.com](mailto:meshbah037@gmail.com); ORCID: 0000-0001-7471-6042

22

23 **Short title:** Oral health vulnerability and associated risks factors

24

25 **\*Correspondence to:** Mohammad Meshbahur Rahman; Department of Biostatistics, National  
26 Institute of Preventive and Social Medicine, Dhaka-1212, Bangladesh. Email:

27 [meshbah037@gmail.com](mailto:meshbah037@gmail.com); ORCID id: 0000-0001-7471-6042. Contact: +8801751509801

28

29 **Abstract**

30 **Background**

31 Tribal elderly is a vulnerable population due to their geographic location and lack of access to healthcare  
32 services. This study aims to assess the oral health status of tribal elderly in Bangladesh and identify any  
33 associated risk factors.

34 **Methods**

35 This cross-sectional pilot survey was conducted among 280 tribal elderlies aged 60 years and above residing  
36 in the main tribal residing region in Bangladesh. The data was collected through cluster sampling methods  
37 using a semi-structured questionnaire and oral examination. Different statistical tools including frequency  
38 distribution, Chi-square association test and multivariable logistic regression model were performed in data  
39 analysis.

40 **Results**

41 The results showed that 25.35% of the tribal elderly had high DMFT score, indicating poor oral health.  
42 Respondents' age, sex, marital status, occupational status, sweet eater, tobacco, and alcohol consumption  
43 were significantly associated with oral health. The major oral clinical sign and symptoms were dental  
44 carries, teeth sensitivity, loose teeth, broken teeth, calculus and staining in teeth, tongue pain and bad breath.  
45 The logistic regression analysis suggested that elderly aged 80 and above had 3.33 times more, males were  
46 4.6 time less, tobacco user (smoked/smokeless) were 2.03 times more and alcohol consumers were 6.83  
47 times more likely to experienced poor oral health condition than their counterparts.

48 **Conclusions**

49 Elderly individuals were found to be more likely to suffer from poor oral health condition than younger  
50 individuals, and certain lifestyle factors such as tobacco and alcohol consumption, meal frequency, and  
51 sweet consumption can further increase the risk of poor oral health condition.

52

53 **Keywords:** DMFT; Oral Health; Risk factors; Tribal Elderly; Bangladesh

54

55 **Introduction**

56 Oral disease is a prevalent cause of medical and emergency room visits that is closely linked to  
57 aging [1,2]. Poor oral health can negatively impact overall health and quality of life, leading to  
58 poor nutritional status among the elderly [3,4]. Consuming carbohydrates, sticky foods, and  
59 sweetened foods can contribute to poor oral health [5,6], as can the use of tobacco and alcohol  
60 [7,8]. Sweetened food and sticky food consumption leads to Dental caries, Gingival bleeding,  
61 periodontitis, calculus and other types of oral health problems [9–11]. Additionally, oral health  
62 problems can cause early loss of teeth and negatively impact the ability to chew food [3]. Geriatric  
63 individuals are particularly vulnerable to dental diseases due to lack of education and access to  
64 care [12–14], suffer from different types of dental diseases [15,16].

65

66 In South Asia, tribal elderly individuals often face significant oral health challenges. Studies have  
67 shown that the prevalence of dental caries among this population is high, with over 60% of  
68 individuals over the age of 60 experiencing the condition [17–19]. Additionally, periodontal  
69 disease is prevalent, with nearly 40% of tribal elderly individuals in the region affected [19–21].  
70 These rates are significantly higher than those seen in non-tribal populations in South Asia. Factors  
71 such as limited access to dental care, poor oral hygiene practices, and a lack of education about  
72 oral health contribute to these high rates of oral health issues among tribal elderly individuals in  
73 the region [22,23].

74

75 Bangladesh, one of the most densely-populated countries in the world where 1.10% of the  
76 country's total population are tribal [24]. They are mainly live in the flatland districts of the north  
77 and southeast of the country, while the rest reside in the Chittagong Hill Tracts [25]. Most of the

78 people of tribes lives in very deep of the jungle and the hills. Smokeless tobacco has been  
79 implicated as a risk factor for numerous oral conditions, starting from gingivitis to oral cancers  
80 [26,27]. Many geriatric people among the tribes have the habit of chewing betel nuts, tobacco leaf  
81 without knowing its side effect [25,28].

82  
83 Research on the oral health of tribal elderly individuals in Bangladesh has shown that they have a  
84 higher incidence of oral health issues compared to the general population [29–31]. One study found  
85 that almost 75% of tribal elderly individuals in Bangladesh had at least one decayed or missing  
86 tooth, and over 50% had periodontal disease [32,33]. This contrasts with the national average,  
87 where only about 60% of older adults have at least one decayed or missing tooth and around 25%  
88 have periodontal disease [32,34,35]. Factors that contribute to the poor oral health of tribal elderly  
89 individuals in Bangladesh include limited access to dental care, poverty, and poor oral hygiene  
90 practices. Additionally, cultural and traditional practices, such as chewing betel nut and tobacco,  
91 can also increase the risk of oral health issues [17,23,36]. Despite these challenges, there are  
92 programs and initiatives in place to improve oral health and access to dental care for tribal elderly  
93 individuals in Bangladesh.

94  
95 The isolation from mainstream development activities, together with poverty and difficult  
96 healthcare accessibility made the tribal communities specifically vulnerable to various problems  
97 including oral health [25,37]. But relatively few studies have focused specifically on the tribal  
98 groups in the country [38,39]. Research on tribal health has predominantly focused on the  
99 prevalence of good oral health, profiles of dental illnesses, and health-provision coverage rather  
100 than people's knowledge, practices, opinions of and attitudes towards health provision in the tribal

101 areas. Therefore, this study aims to assess the oral health status of tribal elderly in Bangladesh and  
102 identify the associated risk factors.

103

## 104 **Methods**

### 105 **Ethical consent and permission for data collection**

106 This study followed the guidelines of World Medical Association (WMA) Declaration of Helsinki.

107 The ethical approval was taken the institutional review board of the National Institute of Preventive

108 and Social Medicine, Dhaka (IRB registration number: NIPSOM/IRB/2019/111) and formal

109 permission of data collection in the community was taken from the tribal community leaders

110 (called '*Karbari*'). Both written and verbal consent was taken from each participant before

111 initiating the interview for data collection. A brief introduction on the aims and objectives of the

112 study was given first and then, the written consent translated in native language was read out for

113 illiterate tribal elderly. Participants who were agreed with the consent were finally included in the

114 study.

115

### 116 **Study design**

117 As a pilot initiative, this study was conducted cross-sectionally involving a person-centered

118 general health assessment and a self-administered questionnaire in this study.

119

### 120 **Sample size, participants, and data collection**

121 In this study, the estimated sample size was found 255 using the proportional sample size

122 calculation formula at 5% margin of error. Considering an additional 10% non-response rate, the

123 final sample size became 280 elderlies residing in tribal community in Bangladesh.

124 The study was conducted among elderlies aged 60 years and above in South-Eastern Bangladesh  
125 from June 2020 to May 2021. Simple random sampling (SRS) technique was used to collect the  
126 data. The residence of the tribal elderlies was divided into 20 *paras* (Para, social geographical  
127 zone, or village in Bangladesh). Eight *paras* were randomly selected by SRS, and then the eligible  
128 elderlies from each *para* were included for further interview. Face-to-face interview technique was  
129 used to collect socio-demographic data along with instruments for anthropometric data. The data  
130 were collected by a trained data enumerator (dental students) using the necessary data collection  
131 tools- Caries probe, Periodontal Probe and Dental Mirror. The inclusion criteria for data collection  
132 were: (i) aged 60 and above; (ii) living in the tribal community of South-Eastern Bangladesh; (iii)  
133 agreed to participate in a general dental health assessment and an interview.

134

### 135 **Variable measurements**

136 Socio-demographic variables of the tribal elderly were age (in complete year), sex, religion,  
137 marital status, monthly family income, educational status, occupation and family type. Personal  
138 habit related variables were tobacco consumption and alcohol consumption. Diet related variables  
139 were meal time, variety of food taking, daily frequency of meal (dinner, lunch, breakfast), snacks  
140 eating, oil, drinking of tea, soft-drinks, sweet and vegetable consumption. The dietary habit was  
141 measured by 24 hours recall methods and 7 days food frequency method and other food related  
142 questions.

143

144 The patients were asked about their oral health conditions. A modified scoring system of WHO  
145 was used to detect gingival and periodontal status among the patients [40]. This score system was  
146 used to determine the periodontal health and gingival condition. They were asked to open their

147 mouth and after checking oral conditions based upon clinical sign symptoms and asking questions  
148 the answers were noted down on the questionnaire. Dependent variable of the study was oral health  
149 status assessed by observing oral health related indicators, and Decayed, Missing due to caries,  
150 and Filled Teeth (DMFT). The DMFT score was computed for each elderly following the guideline  
151 of World Health Organization (WHO) oral health survey [41].

152

### 153 **Statistical analysis**

154 The collected data were processed, edited, and coded first, and observed consistency by frequency  
155 distribution. In data analysis, descriptive statistics including frequency distribution table, graphs  
156 and diagrams were performed first. Elderly oral health status was assessed by DMFT levels. For  
157 analytical purpose, the DMFT index score was statistically classified into high DMFT (poor oral  
158 health status; DMFT score $>$ 5.0) and low DMFT (good oral health status; DMFT score $<$ 5.0)  
159 considering 75% percentiles (75% percentiles of DMFT was 5.0) which also supports WHO  
160 guideline on oral health survey [41]. The Pearson Chi-square test performed to observe the  
161 significantly associated factors of DMFT. The degree of associated factors of DMFT as well as  
162 oral health status was assessed by adjusted odds ratio in multivariable logistic regression model  
163 [12,42]. To perform multivariable logistic regression model, we converted our dependent variable  
164 DMFT as dichotomous [poor oral health status (high DMFT) coded as 1 and good oral health  
165 status (low DMFT) coded as 0]. Dataset management and all the statistical analysis was carried  
166 out through IBM SPSS Statistics 26.0. The confidence interval was used in 95% and level of  
167 confidence was set at 0.05.

168

169

170 **Results**

171 **Background characteristics of the tribal elderly**

172 The second column of Table 1 represents the socio-demographic characteristics of the tribal  
 173 elderly. Among 280 respondents, most (76.8%) of the tribal elderly were 60-69 years of old  
 174 following 14.3% were 70-79 and 8.9% were in the age group 80 and above. The proportion of  
 175 female elderly was higher (63.3% vs. 36.8%) than male and majority (72.1%) of them were  
 176 Buddhist in religion. Majority of the tribal elderly are poor and live in lower socio-economic  
 177 condition where agriculture, day laborer and housewife were the main occupational status.  
 178 Illiteracy rate was high among the tribal community. One-fifth of the tribal elderly live in joint and  
 179 extended family and almost 50% of the family's monthly income was only 10001-20000 Taka  
 180 (\$100-\$200) (Table 1).

181  
 182 The study found that smoking is a common personal habit among tribal elderly and 5% of them  
 183 were alcohol consumer. Nine out of 10 tribal older people receives three-time meal in a day.  
 184 However, meat, fish consumption and tea drinking were also found frequent in the community  
 185 elderly (Table 1).

186 Table 1. Socio-demographic characteristics as the associated factors of DMFT.

| Characteristics           | Frequency | Low DMFT (<5) | High DMFT (>5) | P# value |
|---------------------------|-----------|---------------|----------------|----------|
|                           | n(%)      | n(%)          | n(%)           |          |
| <b>Age</b>                |           |               |                |          |
| 60-69 years               | 215(76.8) | 170(79.1)     | 45(20.9)       | 0.007*** |
| 70 to 79 years            | 40(14.3)  | 25(62.5)      | 15(37.5)       |          |
| >80 Years                 | 25(8.9)   | 14(56.0)      | 11(44.0)       |          |
| <b>Sex</b>                |           |               |                |          |
| Female                    | 177(63.2) | 135(76.3)     | 42(23.7)       | 0.08*    |
| Male                      | 103(36.8) | 74(71.8)      | 29(28.2)       |          |
| <b>Marital Status</b>     |           |               |                |          |
| Married                   | 228(81.4) | 176(77.2)     | 52(22.8)       | 0.04**   |
| Unmarried/widowed/divorce | 52(18.6)  | 33(63.5)      | 19(36.5)       |          |



|                                                                                                                   |           |           |           |          |
|-------------------------------------------------------------------------------------------------------------------|-----------|-----------|-----------|----------|
| <b>Religion</b>                                                                                                   |           |           |           |          |
| Buddhism                                                                                                          | 202(72.1) | 154(76.2) | 48(23.8)  | 0.32     |
| Christian and others                                                                                              | 78(27.9)  | 55(70.5)  | 23(29.5)  |          |
| <b>Educational status</b>                                                                                         |           |           |           |          |
| Literate                                                                                                          | 62(22.1)  | 43(69.4)  | 19(30.6)  | 0.27     |
| Illiterate                                                                                                        | 218(77.9) | 166(76.1) | 52(23.9)  |          |
| <b>Occupational status</b>                                                                                        |           |           |           |          |
| Retire and dependent                                                                                              | 25(8.9)   | 14(56.0)  | 11(44.0)  | 0.014*** |
| Housewife                                                                                                         | 98(35.0)  | 73(74.5)  | 25(25.5)  |          |
| Agriculture/Labour/Other                                                                                          | 107(38.2) | 89(83.2)  | 18(16.8)  |          |
| Business/Employed                                                                                                 | 50(17.9)  | 33(66.0)  | 17(34.0)  |          |
| <b>Family Type</b>                                                                                                |           |           |           |          |
| Single and Nuclear Family                                                                                         | 46(16.4)  | 36(78.3)  | 10(21.7)  | 0.53     |
| Join and Extended Family                                                                                          | 234(83.6) | 173(73.9) | 61(26.1)  |          |
| <b>Monthly Family income (considering \$1=100 Taka)</b>                                                           |           |           |           |          |
| < 10000 Taka (\$100)                                                                                              | 54(19.3)  | 38(70.4)  | 16(29.6)  | 0.701    |
| 10001-20000 Taka (\$100-\$200)                                                                                    | 131(46.8) | 99(75.6)  | 32(24.2)  |          |
| 20001-30000 Taka (\$200-\$300)                                                                                    | 46(16.4)  | 33(71.7)  | 13(28.3)  |          |
| > 30000 Taka (>\$300)                                                                                             | 49(17.5)  | 39(79.6)  | 10(20.4)  |          |
| <b>Tobacco user (smoked or smokeless)</b>                                                                         |           |           |           |          |
| Yes                                                                                                               | 167(59.6) | 131(78.4) | 36(21.6)  | 0.05**   |
| No                                                                                                                | 113(40.4) | 78(69.0)  | 35(31.0)  |          |
| <b>Alcohol Consumption</b>                                                                                        |           |           |           |          |
| Yes                                                                                                               | 14(5.0)   | 6(42.9)   | 8(57.1)   | 0.01***  |
| No                                                                                                                | 265(94.6) | 202(76.2) | 63(23.8)  |          |
| <b>Daily meal consumption</b>                                                                                     |           |           |           |          |
| Less than 3 times                                                                                                 | 16(5.7)   | 11(68.8)  | 5(31.3)   | 0.153    |
| Three times                                                                                                       | 254(90.7) | 193(76.0) | 61(24.0)  |          |
| More than three times                                                                                             | 10(3.6)   | 5(50.0)   | 5(50.0)   |          |
| <b>Meat consumption</b>                                                                                           |           |           |           |          |
| No                                                                                                                | 51(18.2)  | 35(68.6)  | 16(31.4)  | 0.27     |
| Yes                                                                                                               | 229(81.8) | 174(76.0) | 55(24.1)  |          |
| <b>Fish consumption</b>                                                                                           |           |           |           |          |
| No                                                                                                                | 15(5.4)   | 7(46.7)   | 8(53.3)   | 0.027**  |
| Yes                                                                                                               | 265(94.6) | 202(76.2) | 63(23.80) |          |
| <b>Soft Drink user</b>                                                                                            |           |           |           |          |
| No                                                                                                                | 251(89.6) | 189(75.3) | 62(24.7)  | 0.458    |
| Yes                                                                                                               | 29(10.4)  | 20(69.0)  | 9(31.0)   |          |
| <b>Tea Drinker</b>                                                                                                |           |           |           |          |
| No                                                                                                                | 129(46.1) | 103(79.8) | 26(20.2)  | 0.05**   |
| Yes                                                                                                               | 151(53.9) | 106(70.2) | 45(29.8)  |          |
| <b>Sweet eater</b>                                                                                                |           |           |           |          |
| No                                                                                                                | 244(87.1) | 190(77.9) | 54(22.1)  | 0.001*** |
| Yes                                                                                                               | 36(12.9)  | 19(52.8)  | 17(47.2)  |          |
| #Chi-square/Fisher's exact test. *Significant at 10% level; **Significant at 5% level; ***Significant at 1% level |           |           |           |          |

187

188

## 189 **Factors associated with Poor oral health status of tribal elderly**

190 Numerous socio-demographic, food consumption behavior and personal habits related factors  
191 were responsible with the oral health status of tribal elderly obtained by Pearson's Chi-square  
192 association test (Table 1). Respondents from the higher age group and economically dependent  
193 were comparatively experienced to poor oral health status (High DMFT). Variables including  
194 marital status, occupation, tobacco and alcohol consumption history, fish and sweet consumption  
195 and tea drinker were significantly ( $p < 0.05$ ) associated with the oral health status of tribal elderly.

196

## 197 **Oral health status of the tribal elderly**

198 Represents' oral health status was assessed by analyzing DMFT index (Fig 1.a, 1.b and Fig 1.c).  
199 From the Fig 1.a, it was seen that the prevalence of high DMFT as well as poor oral health status  
200 was 25.35%. Which means that one out of four tribal elderly is suffering from poor oral health  
201 condition. Fig 1.b shows the elderly oral health status by their age. Analysis found that poor oral  
202 health status is age neutral and the majority elderly in higher age group are facing poor oral health  
203 condition. In addition, poor oral health condition was found vulnerable in female elderly than male  
204 (Fig 1.c).

205

206 **Fig 1.** DMFT levels as a predictor of oral health - a. Overall DMFT level; b. DMFT level by age  
207 groups and; c. DMFT levels by sex of the tribal elderly in Bangladesh.

208

## 209 **Clinical sign and symptoms related to oral health of the tribal elderly**

210 Respondent's clinical sign and symptoms related to oral health were analyzed in table 2. It was  
211 seen that elderlies were suffering from tooth pain where the problem is high in female than male.

212 Almost all the clinical sign and symptoms including gingival bleeding, dental caries, tooth  
 213 sensitivity, loose and broken tooth and periodontal pocket presented in Table 2 were found high  
 214 in female than their male counterparts whereas gingival bleeding was present high among male  
 215 tribal elderly (Table 2).

216 Table 2. Distribution of clinical sign and symptoms of oral health of the tribal elderly

| <b>Oral health problems</b>             | <b>Male<br/>n (%)</b> | <b>Female<br/>n (%)</b> | <b>Oral health problems</b>                                       | <b>Male<br/>n (%)</b> | <b>Female<br/>n (%)</b> |
|-----------------------------------------|-----------------------|-------------------------|-------------------------------------------------------------------|-----------------------|-------------------------|
| <b>Presence of Tooth Pain</b>           |                       |                         | <b>Presence of staining in tooth</b>                              |                       |                         |
| Yes                                     | 8(7.9)                | 17(9.6)                 | Yes                                                               | 61(35.1)              | 113(64.9)               |
| No                                      | 93(92.1)              | 160(90.4)               | No                                                                | 42(39.6)              | 64(60.4)                |
| <b>Presence of Gingival bleeding</b>    |                       |                         | <b>Presence of pain in tongue</b>                                 |                       |                         |
| Yes                                     | 9(8.7)                | 14(7.9)                 | Yes                                                               | 61(35.1)              | 113(64.9)               |
| No                                      | 94(91.3)              | 163(92.1)               | No                                                                | 42(39.6)              | 64(60.4)                |
| <b>Presence of Dental caries</b>        |                       |                         | <b>Presence of lip pain</b>                                       |                       |                         |
| Yes                                     | 20(19.4)              | 41(23.2)                | Yes                                                               | 0(0.0)                | 1(100)                  |
| No                                      | 83(80.6)              | 136(76.8)               | No                                                                | 103(36.9)             | 176(63.1)               |
| <b>Presence of Sensitivity in tooth</b> |                       |                         | <b>Presence of bad breath</b>                                     |                       |                         |
| Yes                                     | 18(32.7)              | 37(67.3)                | Yes                                                               | 20(40.0)              | 30(60.0)                |
| No                                      | 85(37.8)              | 140(62.2)               | No                                                                | 83(36.1)              | 147(63.9)               |
| <b>Presence of loose teeth</b>          |                       |                         | <b>Pocket of periodontium by scoring</b>                          |                       |                         |
| Yes                                     | 13(26.5)              | 36(73.5)                | Presence of Condition (Pocket 4-5 mm)                             | 6(35.3)               | 11(64.7)                |
| No                                      | 90(39.0)              | 141(61.0)               | Absence of Condition                                              | 97(36.9)              | 166(63.1)               |
| <b>Presence of Broken tooth</b>         |                       |                         | <b>Materials used for oral hygiene practice during toothbrush</b> |                       |                         |
| Yes                                     | 29(34.1)              | 56(65.9)                | Tooth Paste                                                       | 64(36.8)              | 110(63.2)               |
| No                                      | 74(37.9)              | 121(62.1)               | No Materials used                                                 | 2(100)                | 0(0.0)                  |
| <b>Presence of calculus in tooth</b>    |                       |                         | Ash                                                               | 0(0.0)                | 1(100)                  |
| Yes                                     | 35(35.0)              | 65(65)                  |                                                                   |                       |                         |
| No                                      | 68(37.8)              | 112(62.2)               |                                                                   |                       |                         |

217

218 **Degree of associated factors of oral health status**

219 Numerous socio-demographic, food consumption behavior and personal habits related factors  
 220 significantly affects the oral health status of tribal elderly found by examining adjusted odds ratio  
 221 in multivariable logistic regression (Table 3). The chance of affecting to poor oral health condition  
 222 was comparatively higher in older age groups. More specifically, elderly aged 70 -79 years were

223 2.46 [AOR: 2.46; 95% confidence Interval (CI): 1.04-5.85] times more and elderly aged 80 or  
 224 more were 3.33 [AOR: 3.33; 95% confidence Interval (CI): 1.18-9.39] times more likely to suffer  
 225 poor oral health condition than the young elderly (60 to 69 years). Male elderly was 0.46 [AOR:  
 226 0.36; 95% confidence Interval (CI): 0.21-1.01] times lower chance of suffering from poor oral  
 227 health condition than their female counterparts. Similarly, unmarried and minor religious groups  
 228 were more likely to suffer from poor oral health condition. Tobacco user were 2.03 [AOR: 2.03;  
 229 95% CI: 1.02-4.02] times and alcohol consumers were 6.83 [AOR: 6.83; 95% CI: 1.82-25.62]  
 230 times more likely to suffer from poor oral health condition than those who did not consumed.  
 231 Analysis also found that elderly who taken more than three times meal in a day were 3.0 [AOR:  
 232 3.0; 95% CI: 0.43-20.72] times and elderly consumed sweet daily were 3.93 [AOR: 3.93; 95% CI:  
 233 1.66-9.34] times more likely to affect in poor oral health condition (Table 3).

234 Table 3. Summary of multivariable logistic regression model of DMFT to assess of oral health  
 235 status

| Characteristics            | AOR (95% CI)     | P value |
|----------------------------|------------------|---------|
| <b>Age</b>                 |                  |         |
| 60 to 69 years             |                  |         |
| 70 to 79 years             | 2.46 (1.04-5.85) | 0.042   |
| >80 years                  | 3.33 (1.18-9.39) | 0.023   |
| <b>Sex</b>                 |                  |         |
| Female                     |                  |         |
| Male                       | 0.46 (0.21-1.01) | 0.052   |
| <b>Marital Status</b>      |                  |         |
| Married                    |                  |         |
| Unmarried/widowed/divorce  | 1.69 (0.76-3.73) | 0.197   |
| <b>Religion</b>            |                  |         |
| Buddhism                   |                  |         |
| Christian and others       | 1.01 (0.51-2.03) | 0.973   |
| <b>Educational status</b>  |                  |         |
| Illiterate                 |                  |         |
| Literate                   | 1.08 (0.48-2.42) | 0.860   |
| <b>Occupational status</b> |                  |         |
| Retire and dependent       |                  |         |
| Housewife                  | 0.88 (0.28-2.71) | 0.821   |
| Agriculture/Labour/Other   | 0.24 (0.07-0.81) | 0.021   |
| Business/Employed          | 0.97 (0.32-2.96) | 0.953   |

**Tobacco user (smoked or smokeless)**

No  
 Yes 2.03 (1.02-4.02) 0.043

**Alcohol consumption**

No  
 Yes 6.83 (1.82-25.62) 0.004

**Daily eating habit**

Less than 3 times  
 Three times 1.12 (0.31-4.05) 0.869  
 More than three times 3.00 (0.43-20.72) 0.266

**Meat eater**

No  
 Yes 1.32 (0.55-3.19) 0.532

**Fish eater**

No  
 Yes 0.30 (0.08-1.15) 0.079

**Soft drink user**

No  
 Yes 0.98 (0.34-2.79) 0.972

**Sweet eater**

No  
 Yes 3.93 (1.66-9.34) 0.002

---

236

237 **Discussion**

238 Research on the oral health of tribal elderly is rarely conducted in Bangladesh. Although, the  
 239 government has some special health policy focus on overall or main-land elderly but tribal elderly  
 240 in Bangladesh is still vulnerable due to their geographic location. This pilot study cross-sectionally  
 241 collected and analyzed oral health related data of 280 tribal elderly residing Bandarban- a main  
 242 tribal residing region in Bangladesh. The socio-demographic and economic condition of the tribal  
 243 elderly was poor. The female elderly and Buddhist religion were comparatively higher than their  
 244 counterparts.

245

246 In Bangladesh, more than one out of five tribal elderlies were suffering from poor oral health  
 247 status. The rate was very high among female and higher age groups. Generally, elderly from higher

248 age group and females are reluctant to maintain oral health due to their frail physical condition  
249 [43,44]. As a results, they comparatively suffer more in poor oral health condition. This study  
250 revealed that sociodemographic traits, personal habits like alcohol and cigarette use, dietary habits  
251 like eating meat and fish for every meal, drinking soft drinks, drinking tea, and eating sweets, all  
252 are linked to poor oral health condition (High DMFT). According to the World Health  
253 Organization (WHO), elderlies' poor oral health is caused by some modifiable risk factors  
254 including tea and sugar consumption, tobacco use, alcohol use, poor hygiene practice, and their  
255 underlying socio-demographic and commercial determinants [45]. In contrast, K Bruno-  
256 Ambrosius's study conducted among Swedish female teenagers showed that tooth brushing  
257 practices, sweets, and snacks did not significantly affect the development of caries in Swedish  
258 female teenagers [46].

259  
260 The results of this study indicate that the oral health status of the tribal elderly population was  
261 poor, with a prevalence of 25.35% of high DMFT, indicating poor oral health. This suggests that  
262 one out of four tribal elderly individuals are suffering from poor oral health. A recent health care  
263 study supports this finding by demonstrating the oral health issues that tribal groups faced [47].  
264 Numerous literatures suggests that poor oral health status (high DMFT) is negatively associated  
265 with aging and it affects the oral health related quality of life of elderly aged 75 years and more  
266 [48,49]. The results of this research suggest that elderly individuals are more likely to suffer from  
267 poor oral health condition than younger individuals. Specifically, those aged 70-79 years were  
268 2.46 times more likely and those aged 80 or more were 3.33 times more likely to suffer from poor  
269 oral health condition than the young elderly (60 to 69 years). Additionally, male elderly were 0.46  
270 times less likely to suffer from poor oral health condition than their female counterparts.

271 Unmarried and minor religious groups were also more likely to suffer from poor oral health  
272 condition. The finding is consistent with previous research that has found that older adults are at  
273 an increased risk for poor oral health and that women tend to have poorer oral health than men  
274 [48,50]. Furthermore, tobacco users were 2.03 times more likely and alcohol consumers were 6.83  
275 times more likely to suffer from poor oral health condition than those who did not consume either  
276 substance. Lastly, elderly who took more than three meals a day were 3.0 times more likely and  
277 those who consumed sweets daily were 3.93 times more likely to suffer from poor oral health  
278 condition. In line with these findings, it is evident that sugary diets, tobacco use, and alcohol intake  
279 posed significant risks for dental illnesses, discomfort, and function impairment reported the  
280 World Health Organization [19].

281

282 Most of the tribal elderly in Bangladesh live in hilly and hard-to-reach area. Due to the challenging  
283 terrain and limited infrastructure, there is a limited access to healthcare services, including dental  
284 care. However, improving the oral health vulnerability among tribal elderly requires a  
285 comprehensive approach-

286 **Increasing access to dental care-** Mobile dental clinics and outreach programs should be  
287 established in remote tribal areas to provide check-ups, treatments, and oral health education.  
288 Collaborations with local healthcare organizations and dental professionals can ensure affordable  
289 services in areas with limited healthcare facilities.

290 **Raising oral health awareness-** Tailored education programs should emphasize proper oral  
291 hygiene practices, like regular brushing and flossing. Training programs for community health  
292 workers can enable oral health assessments and promote preventive measures [38]. Partnerships  
293 with dental professionals can establish referral systems for specialized care.

294 **Collaboration among stakeholders-** Government agencies, NGOs, dental associations, and tribal  
295 leaders should develop comprehensive oral health programs. International organizations and donor  
296 agencies can provide funding support.

297 **Research and data collection-** Studies should assess oral health status and needs among tribal  
298 elderly in different regions. Data on oral health indicators will facilitate monitoring and evaluation.

299 **Policy development-** Advocacy for policies that allocate resources and establish guidelines for  
300 tribal oral healthcare is necessary. Integrating oral health within existing healthcare policies will  
301 ensure holistic care.

302

### 303 **Conclusion**

304 In conclusion, this study has highlighted the poor oral health status of tribal elderly in Bangladesh.  
305 The findings suggest that elderly individuals are more likely to suffer from poor oral health  
306 condition than younger individuals, and that certain lifestyle factors such as tobacco and alcohol  
307 consumption, as well as meal frequency and sweet consumption, can further increase the risk of  
308 poor oral health condition in the elderly. It is important to note that these findings should be taken  
309 into consideration when developing strategies to improve oral health among the elderly population.  
310

### 311 **Acknowledgement**

312 National institute of Preventive and Social Medicine (NIPSOM), Mohakhali, Dhaka-1212 is an  
313 apex body for public health education and research in Bangladesh. We thank the Department of  
314 Biostatistics, NIPSOM for their technical support during the study. We are thankful to the  
315 participants who provided time and shared their health experiences.

316



317 **Conflict of interest**

318 All authors declared no conflicts of interest.

319

320 **Funding statement**

321 This study received no specific funds from any agencies or organizations.

322

323 **Ethics approval statement**

324 This study followed the guidelines of World Medical Association (WMA) Declaration of Helsinki.

325 The ethical approval of this study was approved by the institutional review board of National

326 Institute of Preventive and Social Medicine (NIPSPOM), Mohakhali, Dhaka, Bangladesh under

327 the registration number NIPSOM/IRB/2019/111. The formal permission of data collection in the

328 community was taken from the tribal community leaders (called ‘Karbari’). Both written and

329 verbal consent were taken from the participants before initiating the interview.

330

331 **Patient consent statement**

332 Both written and verbal consent was taken from each participant before initiating the interview for

333 data collection. A brief introduction on the aims and objectives of the study was given first and

334 then, the written consent translated in native language was read out for illiterate tribal elderly.

335 Participants who were agreed with the consent were finally included in the study.

336

337 **Author’s contributions**

338 **Shomrita Barua-** Contributed in Conception, data collection, analysis, writing original draft,

339 editing and finalizing the version to be submitted. **Sunanda Bosu, Mohammad Farhadul Haque**

340 **& Liza Bosak**- Data collection, writing original draft, editing and finalizing the version to be  
341 submitted. **Md Rezowan Rashid, Shaikh Riaduz Zaman & Md. Foyzur Rahman**- Writing  
342 original draft, editing and finalizing the version to be submitted. **Mohammad Meshbahur**  
343 **Rahman**- Contributed in conception of the study, supervised, analyzed, writing original draft,  
344 editing and finalizing the version to be submitted. All author has read and approved the final  
345 version of the manuscript to be submitted.

346

#### 347 **Data availability statement**

348 The datasets generated and/or analyzed during the current study are available from the  
349 corresponding author on reasonable request to [meshbah037@gmail.com](mailto:meshbah037@gmail.com).

350

351

352

353

354

355

356

357

358

359

360

361

362

## 363 **References**

- 364 1. Chan AKY, Tamrakar M, Jiang CM, Lo ECM, Leung KCM, Chu C-H. Common Medical and Dental  
365 Problems of Older Adults: A Narrative Review. *Geriatrics (Basel)*. 2021;6.  
366 doi:10.3390/geriatrics6030076
- 367 2. Griffin SO, Jones JA, Brunson D, Griffin PM, Bailey WD. Burden of oral disease among older adults  
368 and implications for public health priorities. *Am J Public Health*. 2012;102: 411–418.  
369 doi:10.2105/AJPH.2011.300362
- 370 3. Nicksic NE, Massie AW, Byrd-Williams CE, Kelder SH, Sharma S V, Butte NF, et al. Dietary Intake,  
371 Attitudes toward Healthy Food, and Dental Pain in Low-Income Youth. *JDR Clin Trans Res*. 2018;3:  
372 279–287. doi:10.1177/2380084418774039
- 373 4. Azzolino D, Passarelli PC, De Angelis P, Piccirillo GB, D’Addona A, Cesari M. Poor Oral Health as a  
374 Determinant of Malnutrition and Sarcopenia. *Nutrients*. 2019;11. doi:10.3390/nu11122898
- 375 5. Burt BA, Eklund SA, Morgan KJ, Larkin FE, Guire KE, Brown LO, et al. The Effects of Sugars Intake  
376 and Frequency of Ingestion on Dental Caries Increment in a Three-year Longitudinal Study. *J Dent*  
377 *Res*. 1988;67: 1422–1429. doi:10.1177/00220345880670111201
- 378 6. Millen AE, Dahhan R, Freudenheim JL, Hovey KM, Li L, McSkimming DI, et al. Dietary  
379 carbohydrate intake is associated with the subgingival plaque oral microbiome abundance and  
380 diversity in a cohort of postmenopausal women. *Sci Rep*. 2022;12: 2643. doi:10.1038/s41598-  
381 022-06421-2
- 382 7. Rooban T, Vidya KM, Joshua E, Rao A, Ranganathan S, Rao UK, et al. Tooth decay in alcohol and  
383 tobacco abusers. *Journal of Oral and Maxillofacial Pathology*. 2011;15: 14–21. doi:10.4103/0973-  
384 029X.80032
- 385 8. Dasanayake AP, Warnakulasuriya S, Harris CK, Cooper DJ, Peters TJ, Gelbier S. Tooth Decay in  
386 Alcohol Abusers Compared to Alcohol and Drug Abusers. Vieira AR, editor. *Int J Dent*. 2010;2010:  
387 786503. doi:10.1155/2010/786503
- 388 9. Lula ECO, Ribeiro CCC, Hugo FN, Alves CMC, Silva AAM. Added sugars and periodontal disease in  
389 young adults: an analysis of NHANES III data. *Am J Clin Nutr*. 2014;100: 1182–1187.  
390 doi:10.3945/ajcn.114.089656
- 391 10. Martini D, Galli C, Guareschi C, Angelino D, Bedogni G, Biasini B, et al. Claimed effects, outcome  
392 variables and methods of measurement for health claims on foods proposed under Regulation  
393 (EC) 1924/2006 in the area of oral health. *NFS Journal*. 2018;10: 10–25.  
394 doi:<https://doi.org/10.1016/j.nfs.2017.12.001>

- 395 11. Chen H, Zhang R, Cheng R, Xu T, Zhang T, Hong X, et al. Gingival bleeding and calculus among 12-  
396 year-old Chinese adolescents: a multilevel analysis. *BMC Oral Health*. 2020;20: 147.  
397 doi:10.1186/s12903-020-01125-3
- 398 12. Rahman M, Hamiduzzaman M, Akter M, Farhana Z, Hossain M, Hasan M, et al. Frailty indexed  
399 classification of Bangladeshi older adults' physio-psychosocial health and associated risk factors-  
400 a cross-sectional survey study. *BMC Geriatr*. 2021;21: 3. doi:10.1186/s12877-020-01970-5
- 401 13. Paul GK, Rahman MM, Hamiduzzaman M, Farhana Z, Mondal SK, Akter S, et al. Hypertension and  
402 its physio-psychosocial risks factors in elderly people: a cross-sectional study in north-eastern  
403 region of Bangladesh. *Journal of geriatric cardiology*. 2021;18: 75–82. doi:10.11909/j.issn.1671-  
404 5411.2021.01.011
- 405 14. Rahman M, Begum M, Uddin M, Rahman M. Factors Affecting Health Status of Urban Aged  
406 Population: Evidence from Sylhet, Bangladesh. *Indian Journal of Gerontology*. 2018;32: 103–118.
- 407 15. Bassim CW, MacEntee MI, Nazmul S, Bedard C, Liu S, Ma J, et al. Self-reported oral health at  
408 baseline of the Canadian Longitudinal Study on Aging. *Community Dent Oral Epidemiol*. 2020;48:  
409 72–80. doi:10.1111/cdoe.12506
- 410 16. Calzada MT, Posada-López A, Gutiérrez-Quiceno B, Botero JE. Association Between Tobacco  
411 Smoking, Dental Status and Self-perceived Oral Health in Elderly Adults in Colombia. *J Cross Cult*  
412 *Gerontol*. 2021;36: 187–200. doi:10.1007/s10823-021-09426-y
- 413 17. Ghosal S, Sinha A, Kerketta S, Acharya AS, Kanungo S, Pati S. Oral health among adults aged  $\geq 45$   
414 years in India: Exploring prevalence, correlates and patterns of oral morbidity from LASI wave-1.  
415 *Clin Epidemiol Glob Health*. 2022;18: 101177. doi:<https://doi.org/10.1016/j.cegh.2022.101177>
- 416 18. Neelamana SK, Janakiram C, Varma B. Oral health status and related quality of life among elderly  
417 tribes in India. *J Family Med Prim Care*. 2020;9. Available:  
418 [https://journals.lww.com/jfmpc/Fulltext/2020/09120/Oral\\_health\\_status\\_and\\_related\\_quality\\_](https://journals.lww.com/jfmpc/Fulltext/2020/09120/Oral_health_status_and_related_quality_of_life.28.aspx)  
419 [of\\_life.28.aspx](https://journals.lww.com/jfmpc/Fulltext/2020/09120/Oral_health_status_and_related_quality_of_life.28.aspx)
- 420 19. Petersen PE. The World Oral Health Report 2003: continuous improvement of oral health in the  
421 21st century – the approach of the WHO Global Oral Health Programme. *Community Dent Oral*  
422 *Epidemiol*. 2003;31: 3–24. doi:<https://doi.org/10.1046/j..2003.com122.x>
- 423 20. Lukacs JR. Gender differences in oral health in South Asia: Metadata imply multifactorial  
424 biological and cultural causes. *American Journal of Human Biology*. 2011;23: 398–411.  
425 doi:<https://doi.org/10.1002/ajhb.21164>
- 426 21. World Health Organization. Action plan for oral health in South-East Asia 2022–2030. 25 Oct  
427 2022 [cited 28 Jan 2023]. Available: <https://www.who.int/publications/i/item/9789290210061>

- 428 22. Prasai Dixit L, Shakya A, Shrestha M, Shrestha A. Dental caries prevalence, oral health knowledge  
429 and practice among indigenous Chepang school children of Nepal. *BMC Oral Health*. 2013;13: 20.  
430 doi:10.1186/1472-6831-13-20
- 431 23. Singh A, Purohit BM. Addressing oral health disparities, inequity in access and workforce issues in  
432 a developing country. *Int Dent J*. 2013;63: 225–229. doi:<https://doi.org/10.1111/idj.12035>
- 433 24. Roy P, Deshwara M. Ethnic population in 2022 census: Real picture not reflected. *The Daily Star*.  
434 7 Jan 2023.
- 435 25. Rahman SA, Kielmann T, McPake B, Normand C. Healthcare-seeking Behaviour among the Tribal  
436 People of Bangladesh: Can the Current Health System Really Meet Their Needs? *J Health Popul*  
437 *Nutr*. 2012;30: 353–365. doi:<https://doi.org/10.3329/jhpn.v30i3.12299>
- 438 26. Jabeen S, Manni U, Shakil S. Oral health status among tobacco users in the selected rural  
439 population. *Bangladesh Med J*. 2014;43. doi:<https://doi.org/10.3329/bmj.v43i2.21387>
- 440 27. Zhang Yixin and He J and HB and HR and LM. Effect of tobacco on periodontal disease and oral  
441 cancer. *Tob Induc Dis*. 2019;17. doi:10.18332/tid/106187
- 442 28. Heck JE, Marcotte EL, Argos M, Parvez F, Ahmed A, Islam T, et al. Betel quid chewing in rural  
443 Bangladesh: prevalence, predictors and relationship to blood pressure. *Int J Epidemiol*. 2012;41:  
444 462–471. doi:10.1093/ije/dyr191
- 445 29. Sa S, Haseen F, Ss I, Sf C. Knowledge and Practice of Oral Health and Hygiene and Oral Health  
446 Status among School Going Adolescents in a Rural Area of Sylhet District, Bangladesh. *CBMJ*.  
447 2021.
- 448 30. Kabir MN, Ahmed MB, Khan M. Knowledge and Oral Hygiene Practice by School Children in Cox's  
449 Bazar, Bangladesh. *Update Dental College Journal*. 2019;9: 27–31. doi:10.3329/updcj.v9i2.43736
- 450 31. Sayeed Ahmad M, Abdullah Al-Mamun M, Begum S, Shahidul Islam M, Ahsan Habib M,  
451 Mahafuzur Rahman M. Knowledge and Practice About Oral Hygiene by Tribal People (Orao) in  
452 Rangpur Region. *Bangladesh International Journal of Dental Medicine*. 2015;1: 28–32.  
453 doi:10.11648/j.ijdm.20150103.12
- 454 32. Iqbal MdA, Mohol J, Afrin F, Khaleque MdA, Hohra F-T, Jannat N. Prevalence of periodontal  
455 diseases among the patient visiting at Periodontology OPD Update Dental College Hospital,  
456 Dhaka. *Updat Dent Coll J*. 2015;5: 23–29. doi:<https://doi.org/10.3329/updcj.v9i2.43733>
- 457 33. van Palenstein Helderma WH, Joarder MA, Begum A. Prevalence and severity of periodontal  
458 diseases and dental caries in Bangladesh. *Int Dent J*. 1996;46: 76–81. Available:  
459 <http://europepmc.org/abstract/MED/8930677>

- 460 34. Pearson N, Croucher R, Marcenes W, O'Farrell M. Dental health and treatment needs among a  
461 sample of Bangladeshi medical users aged 40 years and over living in Tower Hamlets, UK. *Int*  
462 *Dent J.* 2001;51: 23–29. doi:<https://doi.org/10.1002/j.1875-595X.2001.tb00813.x>
- 463 35. Mth C, Mai K, Afma C. Prevalence of Gingivitis, Plaque accumulation and Decayed, Missing and  
464 Filled Teeth among slum population in Bangladesh. *Bangladesh Med Res Counc Bull.* 2014.
- 465 36. World Health Organization. Global oral health status report: towards universal health coverage  
466 for oral health by 2030. 2022 Nov. Available:  
467 <https://www.who.int/publications/i/item/9789240061484>
- 468 37. Davy C, Harfield S, McArthur A, Munn Z, Brown A. Access to primary health care services for  
469 Indigenous peoples: A framework synthesis. *Int J Equity Health.* 2016;15: 163.  
470 doi:[10.1186/s12939-016-0450-5](https://doi.org/10.1186/s12939-016-0450-5)
- 471 38. Chowdhury S, Roy S, Hasan M, Sadique A Al, Islam T, Hasan M, et al. Oral health knowledge,  
472 practice, and oral health status among rohingya refugees in Cox's Bazar, Bangladesh: A cross-  
473 sectional study. *PLoS One.* 2022;17: e0269359-. Available:  
474 <https://doi.org/10.1371/journal.pone.0269359>
- 475 39. Ahmad M, Al-Mamun M, Islam M, Siddik A, Rahman M, Asaduzzaman H. Oral hygiene practice  
476 and oral health status of geriatric population in selected area of Rangpur, Bangladesh. *KYAMC*  
477 *Journal.* 2018. doi:<https://doi.org/10.3329/kyamcj.v9i2.38146>
- 478 40. Preshaw PM. Detection and diagnosis of periodontal conditions amenable to prevention. *BMC*  
479 *Oral Health.* 2015;15 Suppl 1: S5. doi:[10.1186/1472-6831-15-S1-S5](https://doi.org/10.1186/1472-6831-15-S1-S5)
- 480 41. World Health Organization. Oral health surveys : basic methods. 5th ed. WHO, editor. World  
481 Health Organization; 2013.
- 482 42. Paul G, Rahman MM, Naznin S, Chowdhury M, Uddin MJ. Depression and Anxiety among  
483 University Students: A Comparison between COVID-19 Pandemic Panic Period and Post-panic  
484 Period in Bangladesh. *Open Access Maced J Med Sci.* 2022;10: 52–59.  
485 doi:[10.3889/oamjms.2022.7559](https://doi.org/10.3889/oamjms.2022.7559)
- 486 43. Hakeem FF, Bernabé E, Sabbah W. Association between oral health and frailty: A systematic  
487 review of longitudinal studies. *Gerodontology.* 2019;36: 205–215.  
488 doi:<https://doi.org/10.1111/ger.12406>
- 489 44. Kim H, Lee E, Lee S-W. Association between oral health and frailty: results from the Korea  
490 National Health and Nutrition Examination Survey. *BMC Geriatr.* 2022;22: 369.  
491 doi:[10.1186/s12877-022-02968-x](https://doi.org/10.1186/s12877-022-02968-x)
- 492 45. World Health Organization. Oral health. In: WHO [Internet]. 18 Nov 2022 [cited 16 Jan 2023].  
493 Available: <https://www.who.int/news-room/fact-sheets/detail/oral-health>

- 494 46. BRUNO-AMBROSIUS K, SWANHOLM G, TWETMAN S. Eating habits, smoking and toothbrushing in  
495 relation to dental caries: a 3-year study in Swedish female teenagers. *Int J Paediatr Dent.*  
496 2005;15: 190–196. doi:<https://doi.org/10.1111/j.1365-263X.2005.00621.x>
- 497 47. Cladoosby B (Speepots). Indian Country Leads National Movement to Knock Down Barriers to  
498 Oral Health Equity. *Am J Public Health.* 2017;107: S81–S84. doi:10.2105/AJPH.2017.303663
- 499 48. Baniasadi K, Armoon B, Higgs P, Bayat A-H, Mohammadi Gharehghani MA, Hemmat M, et al. The  
500 Association of Oral Health Status and socio-economic determinants with Oral Health-Related  
501 Quality of Life among the elderly: A systematic review and meta-analysis. *Int J Dent Hyg.* 2021;19:  
502 153–165. doi:<https://doi.org/10.1111/idh.12489>
- 503 49. Patel J, Wallace J, Doshi M, Gadanya M, ben Yahya I, Roseman J, et al. Oral health for healthy  
504 ageing. *Lancet Healthy Longev.* 2021;2: e521–e527. doi:[https://doi.org/10.1016/S2666-](https://doi.org/10.1016/S2666-7568(21)00142-2)  
505 [7568\(21\)00142-2](https://doi.org/10.1016/S2666-7568(21)00142-2)
- 506 50. Ferraro M, Vieira AR. Explaining Gender Differences in Caries: A Multifactorial Approach to a  
507 Multifactorial Disease. Seymen F, editor. *Int J Dent.* 2010;2010: 649643.  
508 doi:10.1155/2010/649643
- 509
- 510
- 511

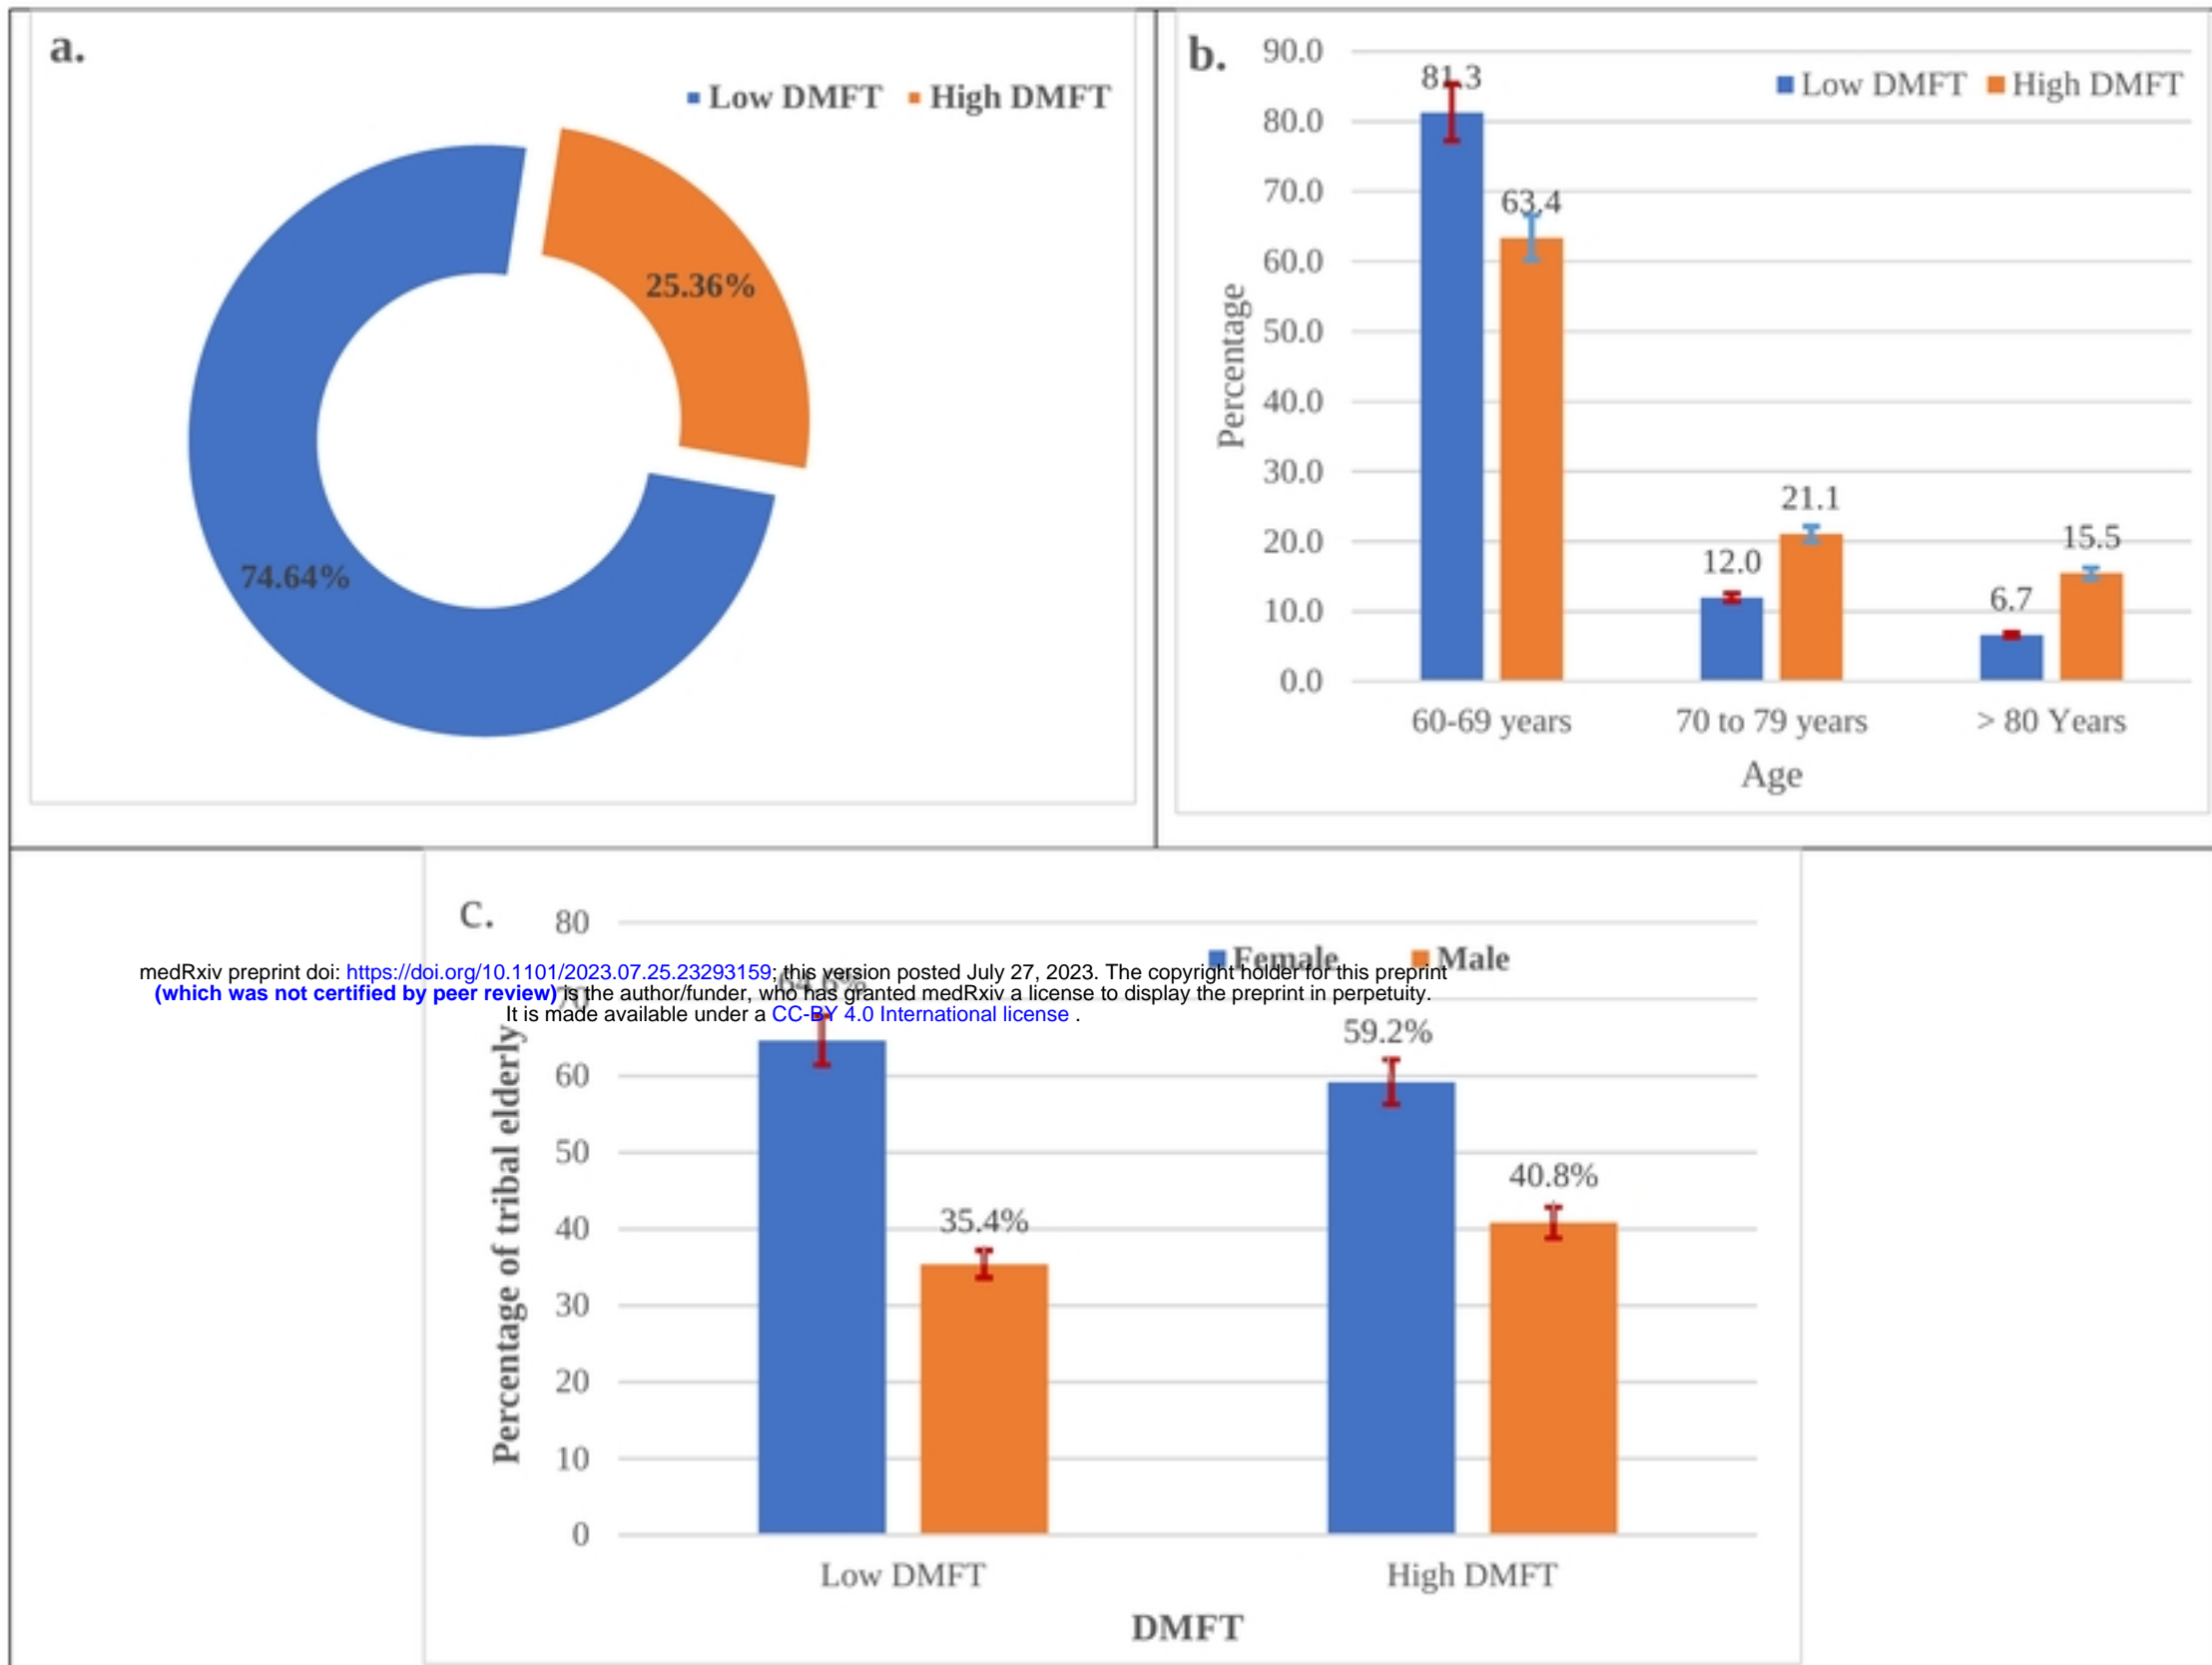

Fig 1
